# Supplementary material for: Cyclin-dependent kinase 7 is a therapeutic target in high-grade glioma
Source: PubMed Central journal article supplement (PMC5523066; doi:10.1038/oncsis.2017.33), 2017-05-15
Supplement: oncsis201733x1.pdf [file oncsis201733x1.pdf]

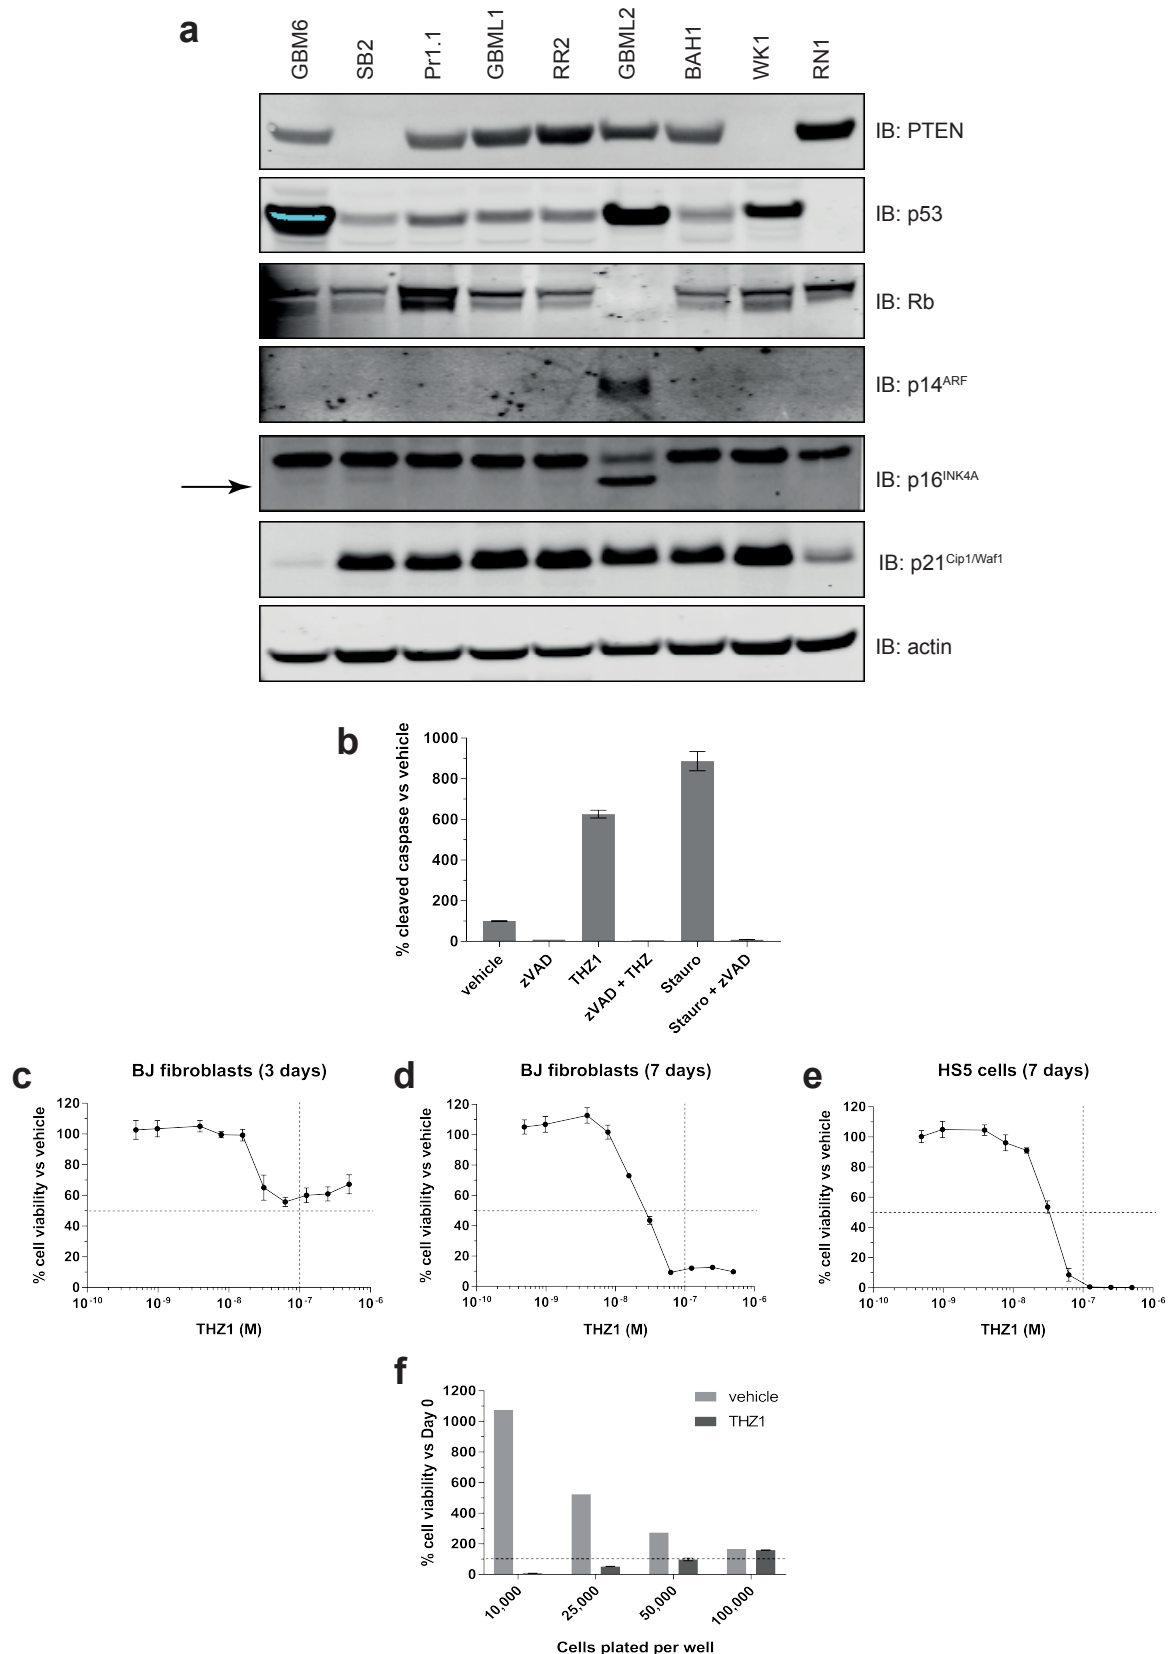

**Supplementary Fig 1** Initial characterisation of the response of cancerous and normal cells to THZ1.

(a) Tumour suppressor and oncogene characterisation in patient-derived, HGG primary cell line panel. Cells were harvested and lysates analysed by western blotting. Actin (bottom panel) was used as a loading control. The arrow indicates the p16-specific band. (b) Caspase 3/7 activity assay confirming that the pan caspase inhibitor, z-VAD-fmk, abolishes THZ1 and staurosporine induced caspase activity in RR2 HGG cells. (c-d) Proliferation curves for BJ Fibroblasts treated for (c) 3 days or (d) 7 days with 200 nM THZ1. (e) Proliferation curves for HS5 bone marrow stromal cells treated for 7 days with 200 nM THZ1. For all proliferation curves, data is represented as the percentage of viable cells vs vehicle control at each dose  $\pm$  s.e.m. Horizontal dashed line = 50% inhibition of cell viability. Vertical dashed line; 100 nM THZ1 concentration. (f) Cell viability graphs for SF767 HGG cells plated at various confluencies and treated for 7 days with 200 nM THZ1. Dashed line indicates the same reading as plating at day 0.

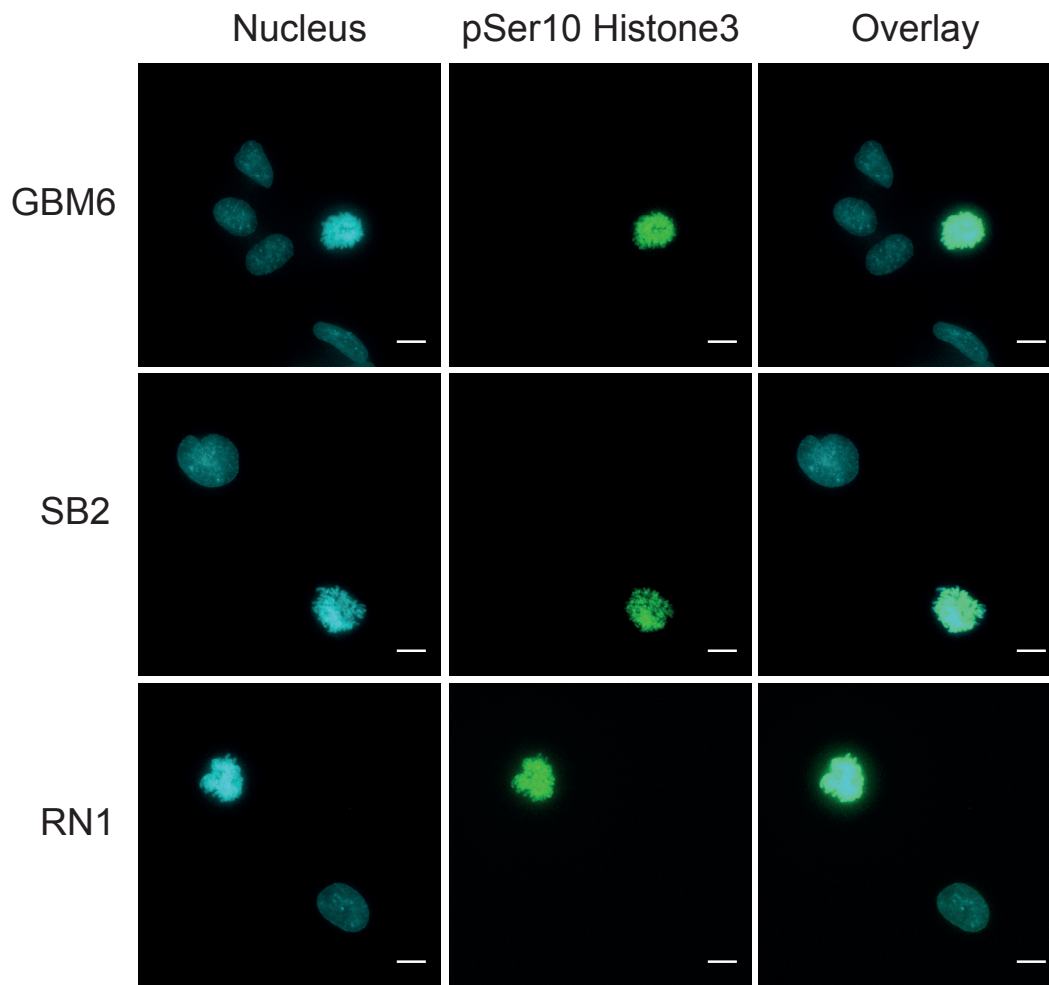

**Supplementary Fig 2** Confirmation by immunofluorescence that pSer10 Histone3 only stains mitotic HGG cells. Cells were grown on chamber slides for 48 h before fixation, permeabilisation and staining for pSer10 Histone3 (green). Nucleus = blue. Scale bar = 10  $\mu$ m. Note that only mitotic cells demonstrating chromosome condensation are bound by the antibody.

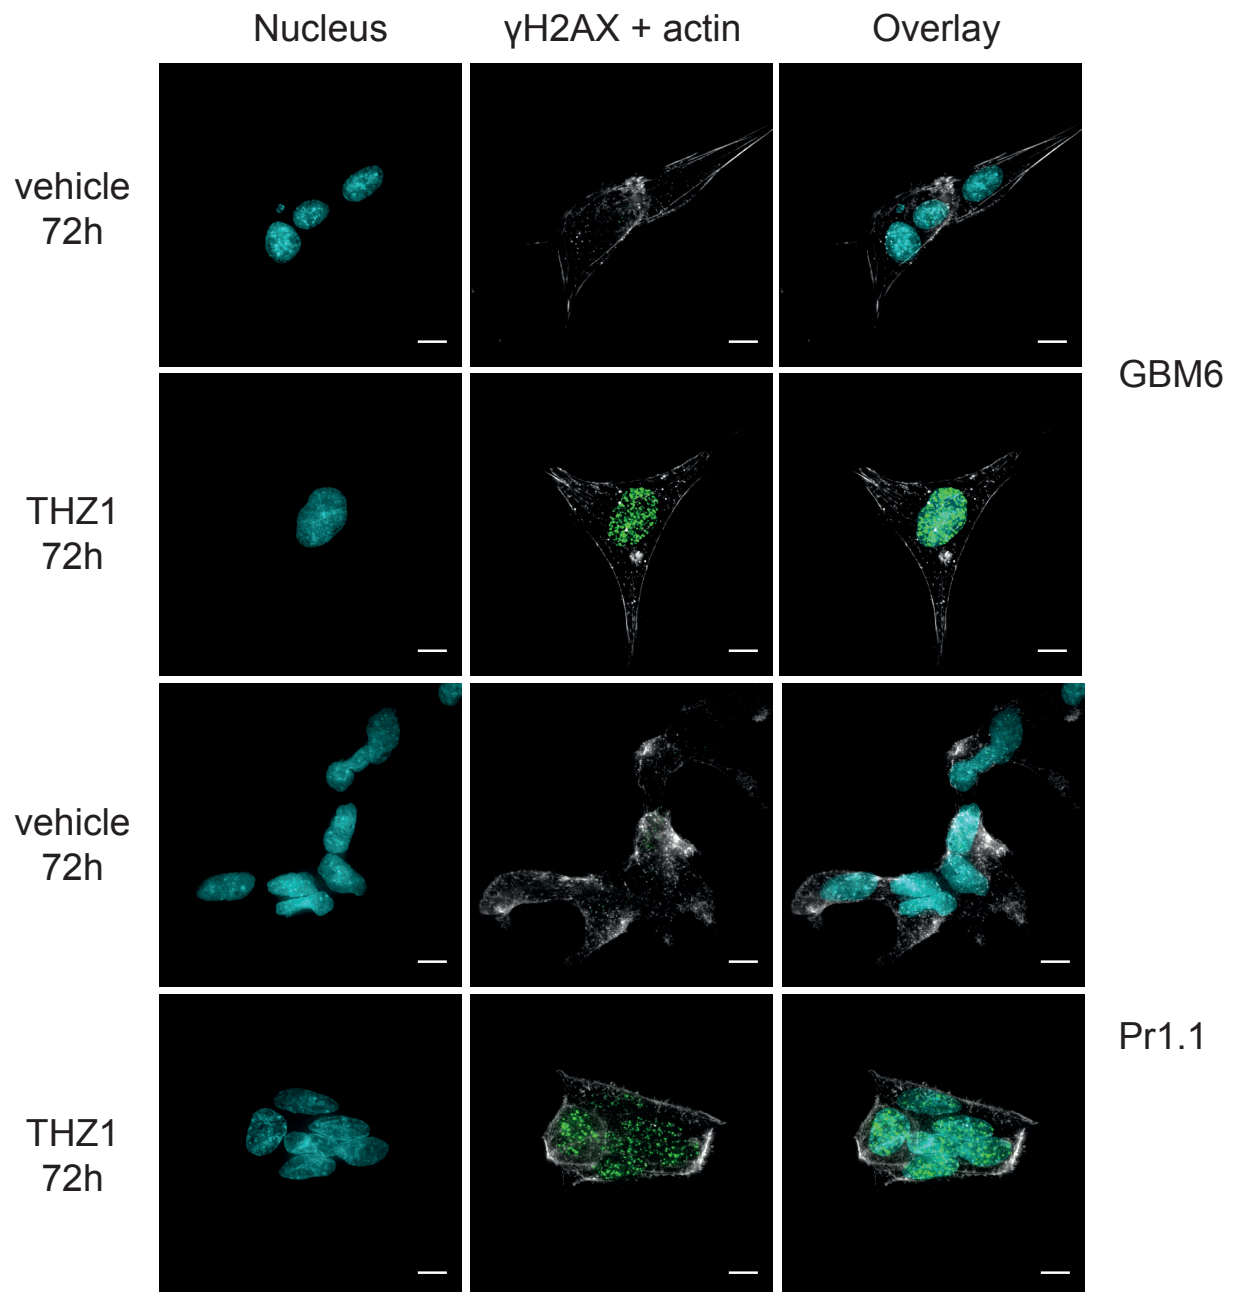

**Supplementary Fig 3** THZ1 induces DNA damage in GBM6 and Pr1.1 cell lines. Cells were treated for 72 h with vehicle or 200 nM THZ1, fixed, permeabilised and stained for pSer139  $\gamma$ H2AX (green). Cells were also co-stained for actin (grey) and nucleus (blue). Scale bar = 10  $\mu$ m.

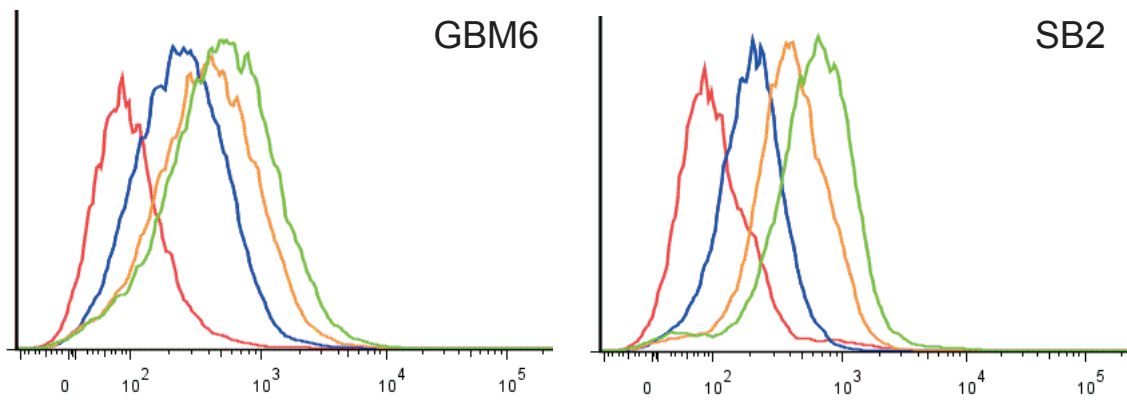

**Supplementary Fig 4** THZ1 induces cumulative DNA damage over time. Cells were treated with vehicle or 200 nM THZ1 for 24 h, 48 h or 72 h and then processed for intranuclear staining of  $\gamma$ H2AX by flow cytometry. The signal for  $\gamma$ H2AX detection steadily increases at each time point for THZ1 treated cells. Red = vehicle control; blue = THZ1 24 h; orange = THZ1 48 h; green = THZ1 72 h.

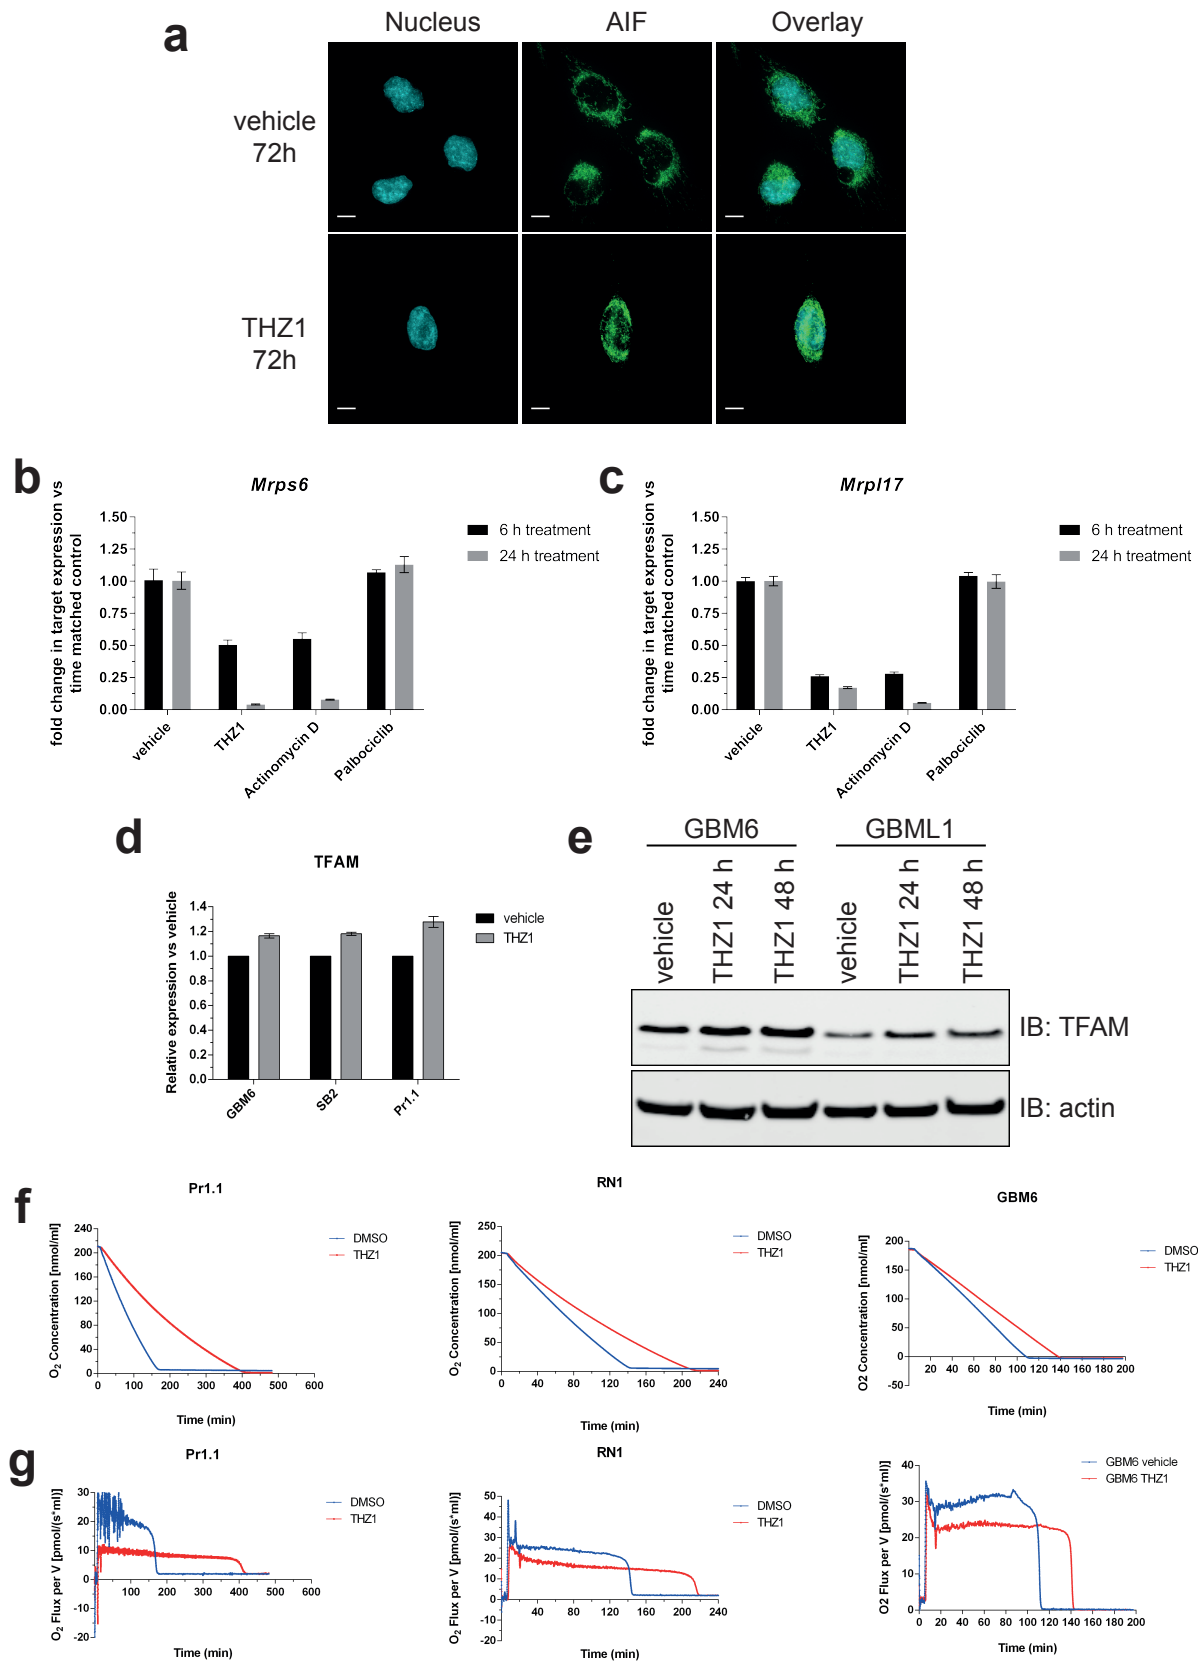

**Supplementary Fig 5** THZ1 results in mitochondrial damage. **(a)** AIF (green) translocation to the nucleus (blue) in SB2 cells treated for 72 h with vehicle or 200 nM THZ1. Scale bar = 10  $\mu$ m. RT-qPCR profiles for *Mrps6* **(b)** or *Mrp17* **(c)** detection following various treatments at 6 h or 24 h in RR2 cells. **(d)** TFAM RT-qPCR profiles after treatment of cells with vehicle or 200 nM THZ1 for 24 h. **(e)** TFAM western blots from lysates isolated from cells treated with vehicle or 200 nM THZ1 for 24 h and 48 h. **(f-g)** THZ1 suppresses oxidative respiration in Pr1.1, RN1 and GBM6 cells. Cells were treated with vehicle or 200 nM THZ1 for 24 h after which they were tested by high resolution respirometry. **(f)** Oxygen concentration in each sealed chamber over time. **(g)** Oxygen flux for each chamber over time.

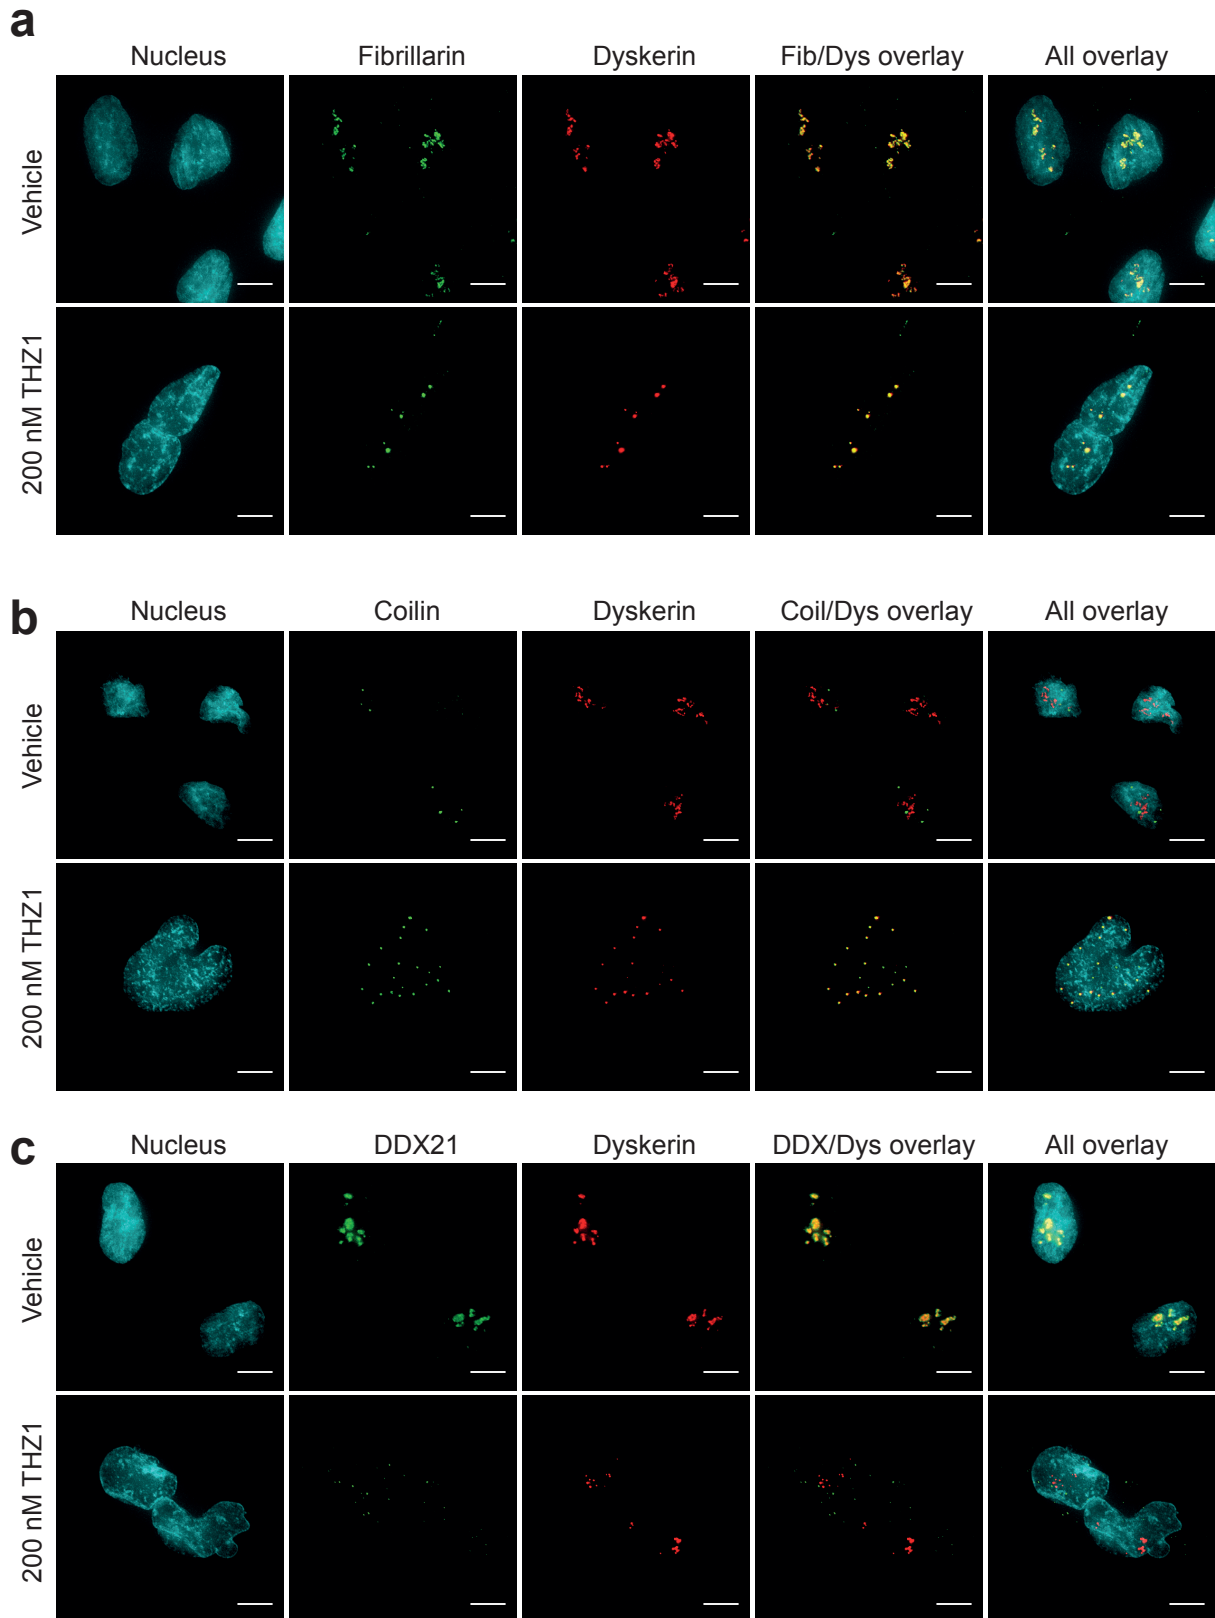

**Supplementary Fig 6** THZ1 disrupts the nucleolus and Cajal bodies in SB2 cells, leading to unusual spatiotemporal association of coilin with the nucleolar components. Cells were treated for 48 h then stained for immunofluorescence for the nucleolus using dyskerin and fibrillarin (**a**); the Cajal bodies and nucleolus using coilin and dyskerin (**b**) or the nucleolus using DDX21 and fibrillarin (**c**). Nucleus = blue, co-localisation = yellow. Scale bar = 10  $\mu$ m.

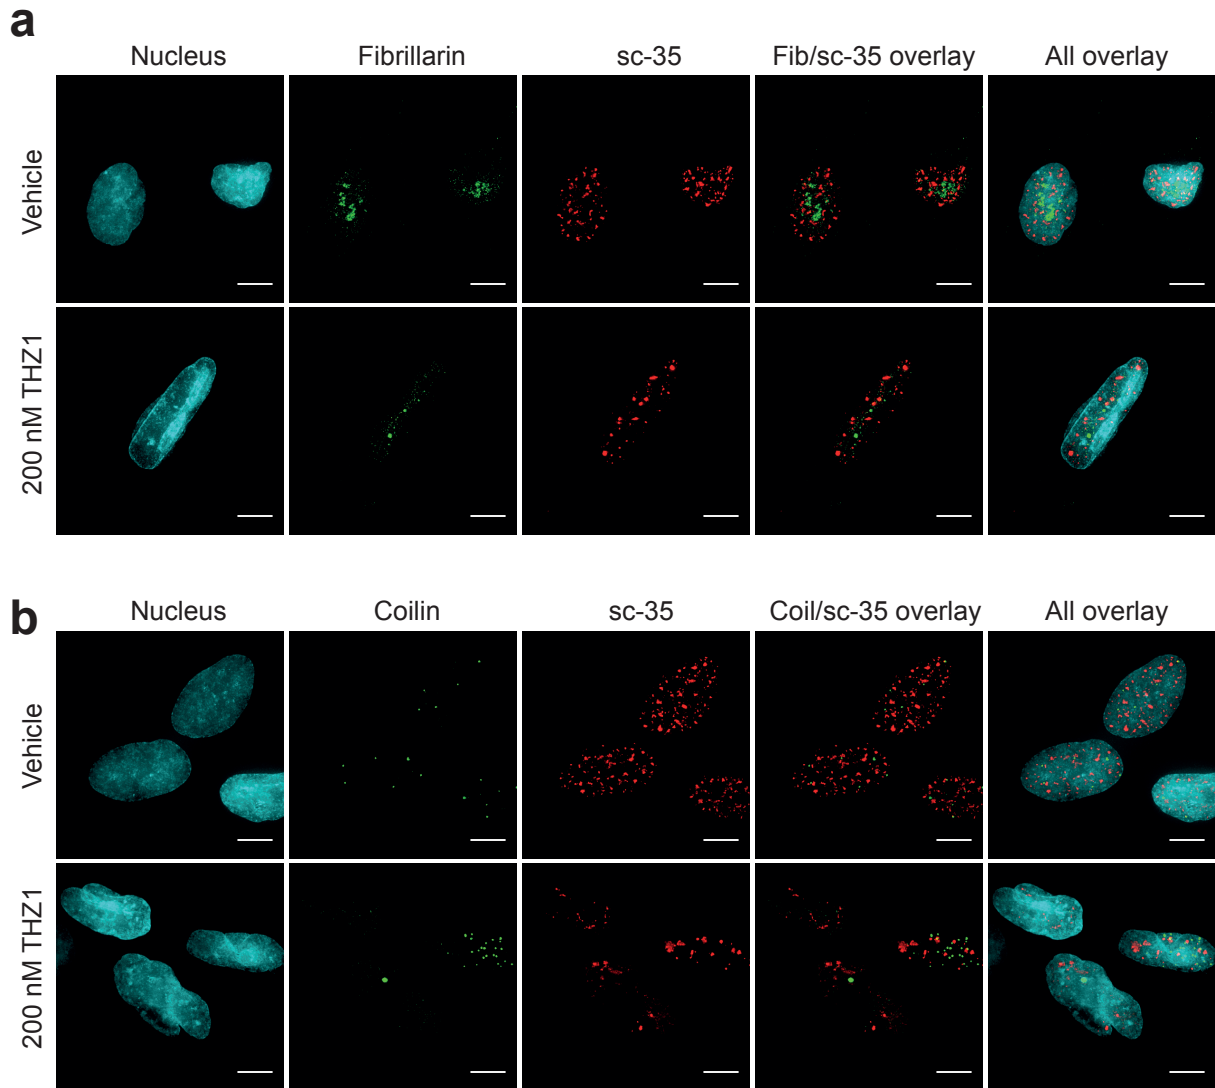

**Supplementary Fig 7** THZ1 disrupts the nuclear speckles, the sites of mature spliceosome function in SB2 cells. Cells were treated for 48 h then stained for immunofluorescence for the nucleolus and nuclear speckles using fibrillarlin and sc-35 (a) or the Cajalbodies and nuclear speckles using coilin and sc-35 (b). Nucleus = blue, co-localisation = yellow. Scale bar = 10  $\mu$ m.

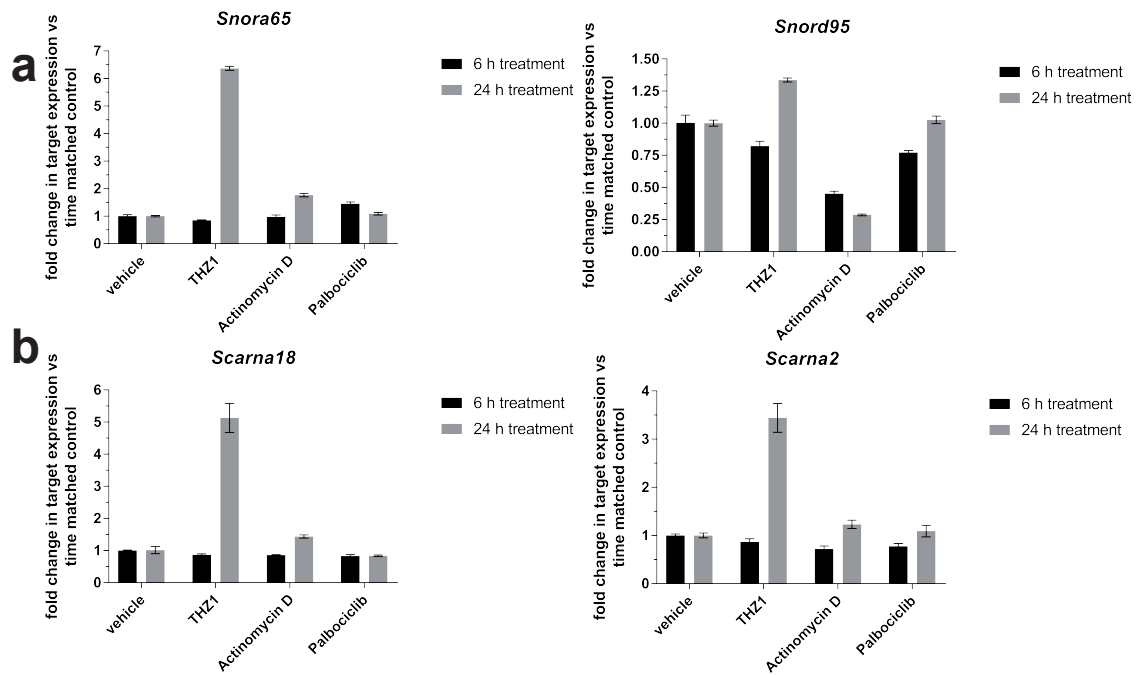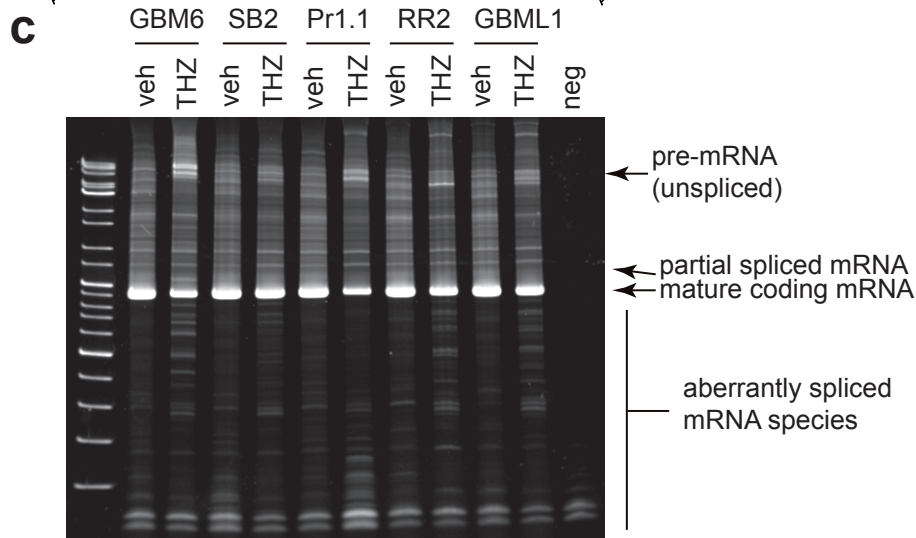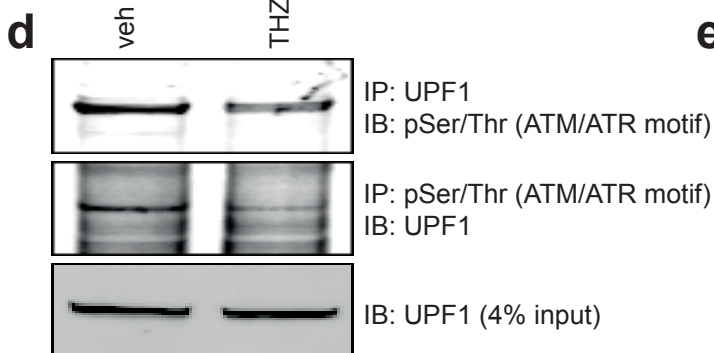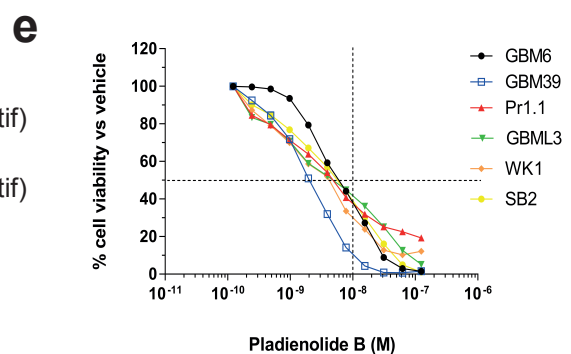

**Supplementary Fig 8** THZ1 perturbs spliceosomal function. RT-qPCR profiles for *Snora65* and *Snord95* (a) or *Scarna18* and *Scarna2* (b) following treatment of RR2 HGG cells with various drugs for 6 h or 24 h. (c) RT-PCR for the entire length of the snoRNA host gene, *Rack1*, demonstrating dysfunctional transcript splicing. (d) NMD is downregulated in response to THZ1 in GBM6 cells. Immunoprecipitation and western analysis of phosphorylated UPF1 and total UPF1 was conducted on cell lysates isolated after treatment with vehicle or 200 nM THZ1. A western blot for total UPF1 conducted on 4% of the IP lysate was used as an input control. (e) Primary HGG cells are inhibited by low nanomolar concentrations of the spliceosome inhibitor, Pladienolide B. HGG cells were treated with a titration of Pladienolide B for 7 days and subjected to cell viability assays. Data are presented as the percentage of viable cells vs vehicle control at each dose  $\pm$  s.e.m. Horizontal dashed line = 50% inhibition of cell viability. Vertical dashed line; 10 nM Pladienolide B concentration.



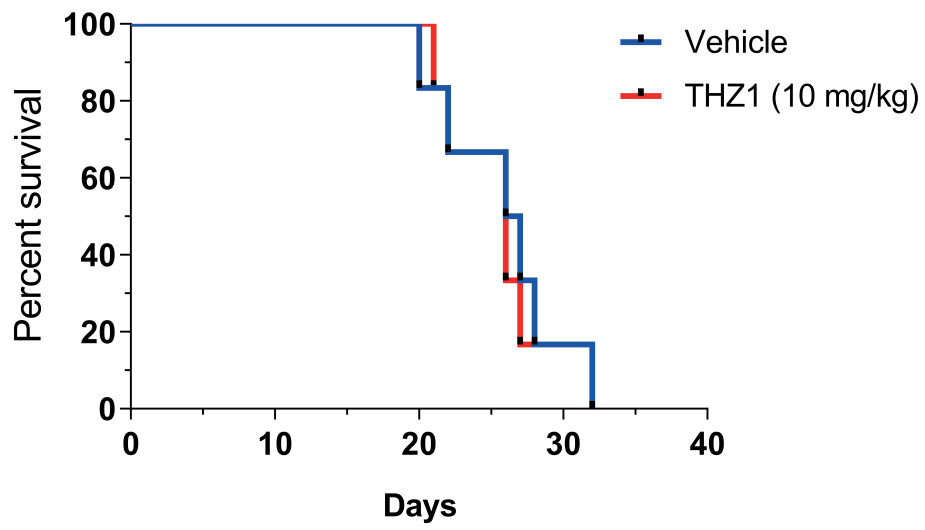

**Supplementary Fig 9** THZ1 does not cross the blood brain barrier. Nude mice were implanted intracranially with GBM6 cells before treatment with vehicle or 10 mg/kg THZ1 q2d for two weeks. Data are presented as Kaplan-Meier curves demonstrating percentage survival of mice over time.

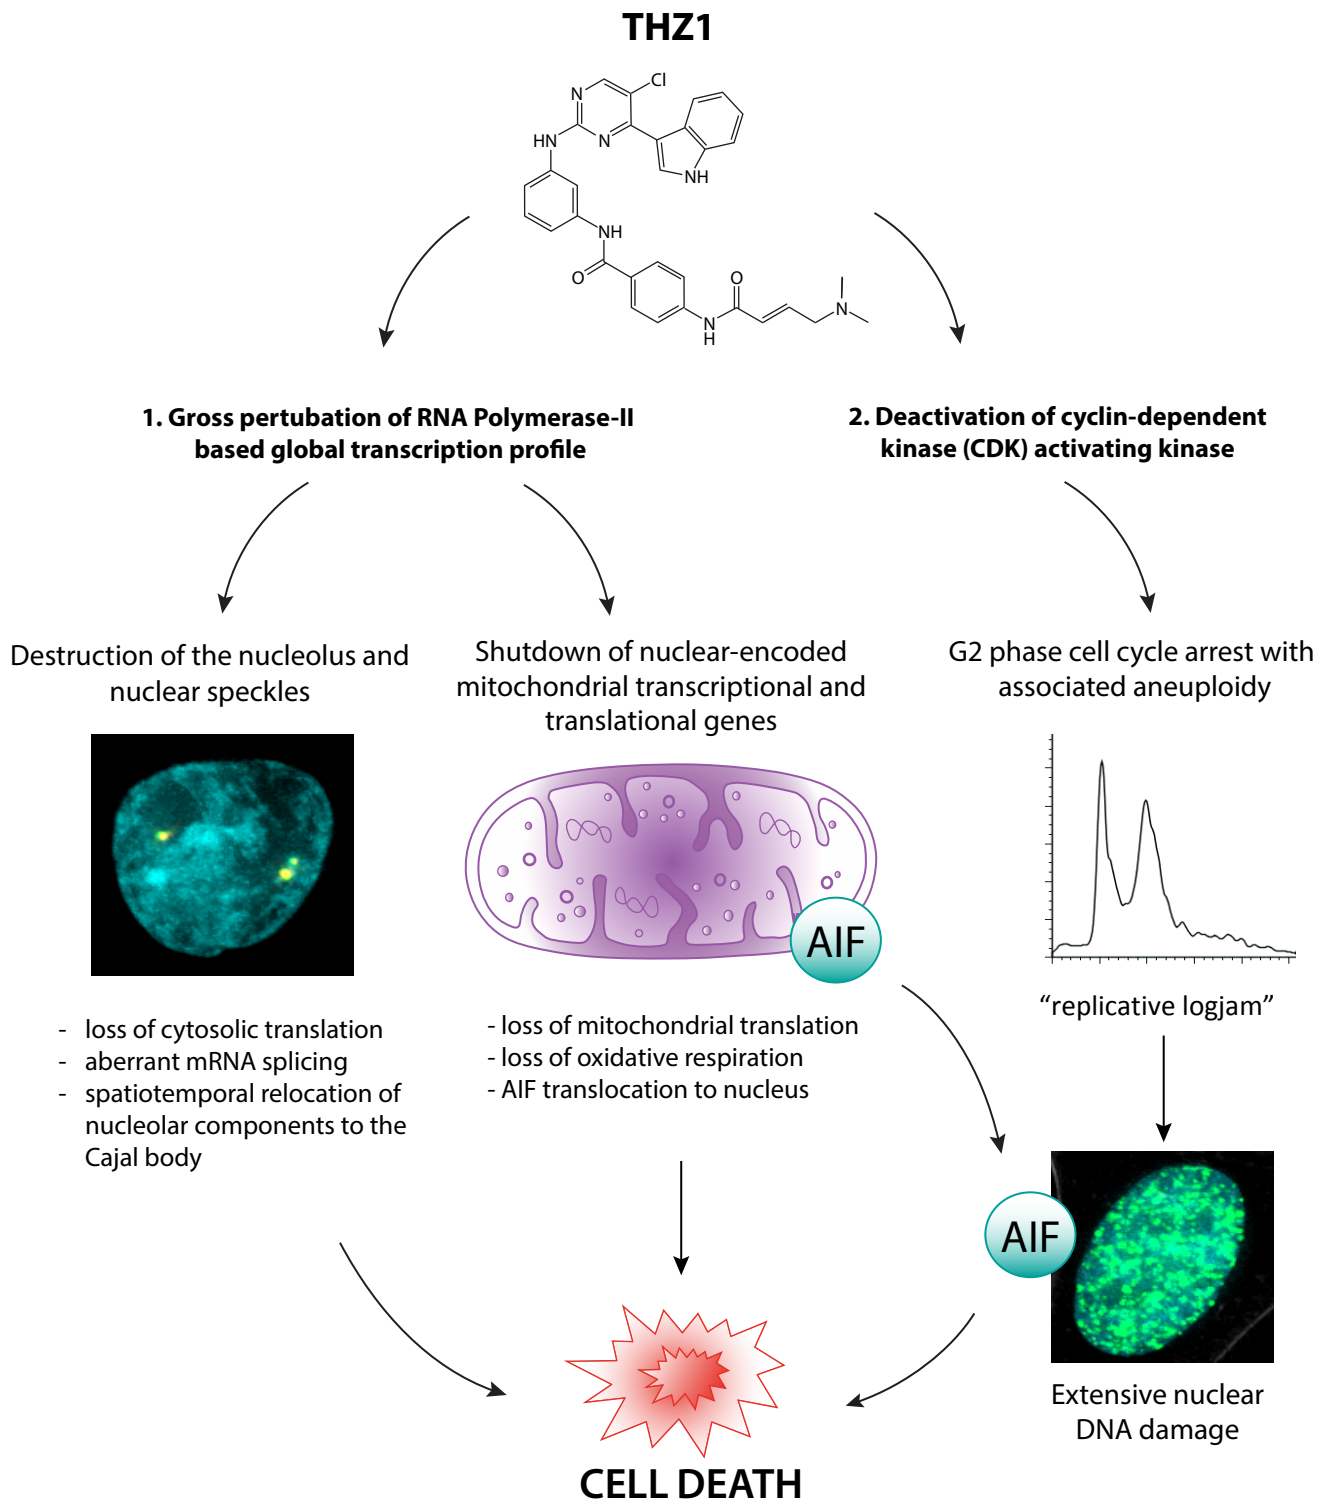

**Supplementary Fig. 10** Overview of THZ1 mechanism of action in primary HGG cells. THZ1 initiates a cascade of cellular perturbations ultimately leading to mitochondrial damage, DNA damage, loss of cytoplasmic translation and spliceosome malfunction, leading to HGG cell death.

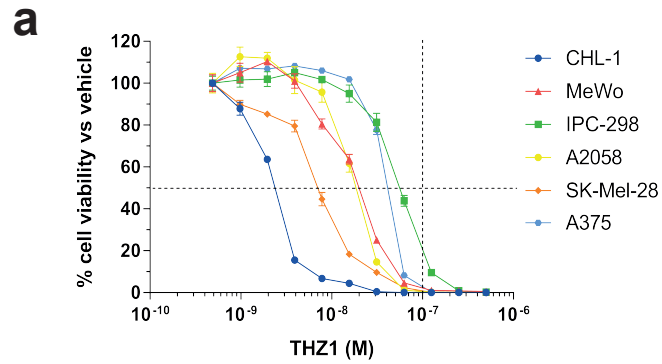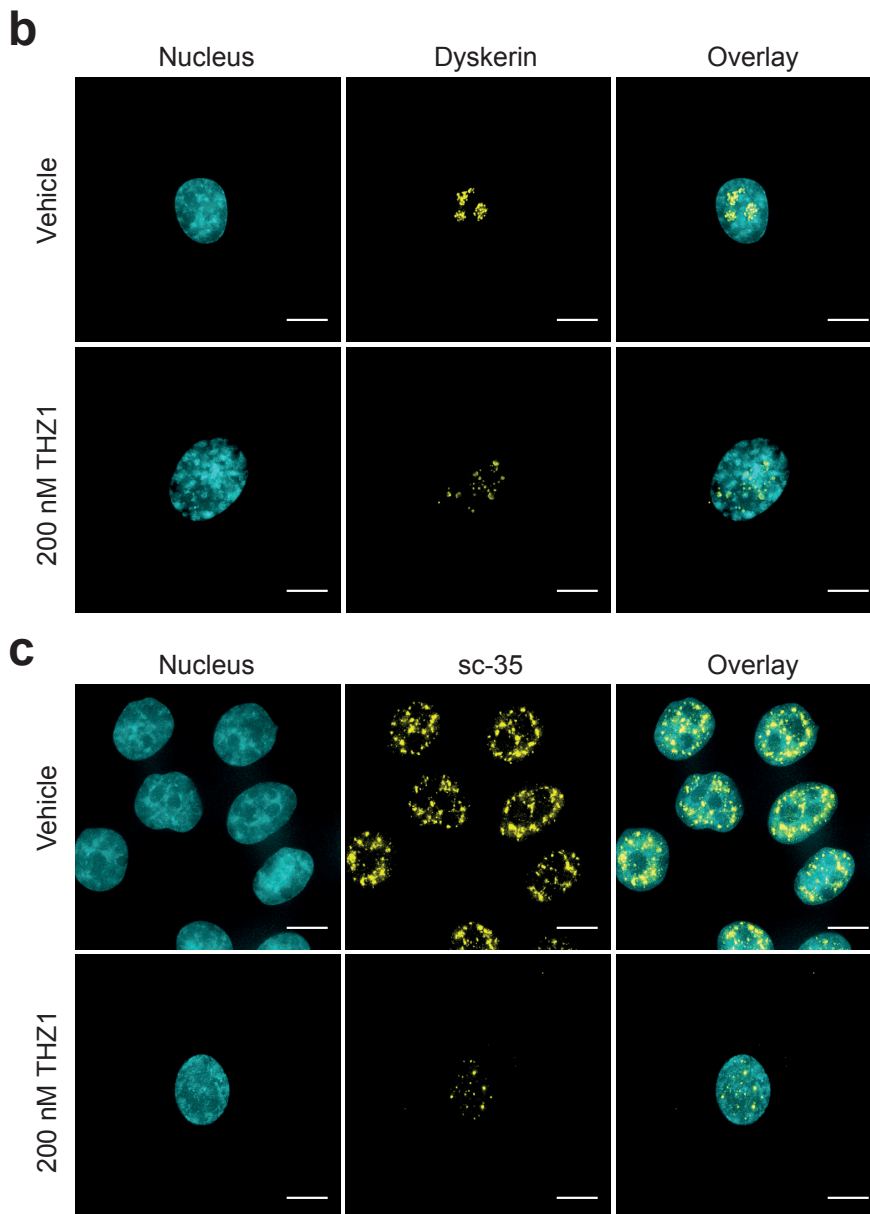

**Supplementary Fig 11** THZ1 has a similar mechanism of action in melanoma cells. (a) Cell viability curves for several melanoma cell lines, representing a range of different RAF, RAS and NF1 genotypes, treated with titrated THZ1 for 5 days. Horizontal dashed line:  $IC_{50}$ ; vertical dashed line: 100 nM THZ1. The nucleolus (b) and nuclear speckles (c) are disrupted by THZ1 treatment in the melanoma cell line A375. Cells were stained by immunofluorescence for dyskerin (nucleolus) and sc-35 (nuclear speckles). Nucleus = blue, Target = yellow. Scale bar = 10  $\mu$ m.

**Supplementary Table 1 Known subtypes and exome changes for neurosphere panel used in this study**

|           |             | Known gene mutation status |               |             |                                                        |                             |                 |                 |                   |               |            |                   |                 |
|-----------|-------------|----------------------------|---------------|-------------|--------------------------------------------------------|-----------------------------|-----------------|-----------------|-------------------|---------------|------------|-------------------|-----------------|
| Cell line | Subtype     | <i>CDKN2A</i>              | <i>CDKN2B</i> | <i>P53</i>  | <i>RB</i>                                              | <i>EGFR</i>                 | <i>MET</i>      | <i>PTEN</i>     | <i>PIK3CA</i>     | <i>PIK3R1</i> | <i>RAS</i> | <i>NF1</i>        | <i>MDM2</i>     |
| GBM-L1    | ?           | Δ/Δ                        | Δ/Δ           |             |                                                        | wt/wt                       |                 |                 |                   |               | wt/G13D    | wt/G1977V         |                 |
| GBM-L2    | ?           | wt/wt                      | wt/wt         | wt/P146S    | exon 17<br>c.1499<br>G>A<br>splice<br>acceptor<br>site | wt/wt                       |                 |                 |                   |               |            |                   |                 |
| GBM-L3    | ?           | ?                          | ?             |             |                                                        | wt/wt                       |                 |                 |                   |               | wt/G13D    |                   |                 |
| GBM6      | Classical   | Δ/Δ                        | Δ/Δ           | R273H/R273H |                                                        | EGFRvIII<br>(amp)           |                 |                 |                   |               |            |                   |                 |
| BAH1      | Neural      | Δ/Δ                        | Δ/Δ           |             |                                                        | EGFRvIII<br>(amp)           |                 |                 |                   | Δ/Δ           |            |                   |                 |
| SB2       | Classical   | Δ/Δ                        | Δ/Δ           |             |                                                        | wt/A289V/<br>H304Y<br>(amp) | C800F/<br>C800F | Δ/Δ             | Y1021H/<br>Y1021H |               |            |                   | W329C/<br>W329C |
| WK1       | Mesenchymal | Δ/Δ                        | Δ/Δ           | Δ/Δ         |                                                        | wt/wt                       |                 | Δ/Δ             |                   |               |            |                   |                 |
| RR2       | ?           | Δ/Δ                        | Δ/Δ           |             |                                                        | wt/wt                       |                 | G132D/<br>G132D |                   |               |            | C1016Y/<br>C1016Y |                 |
| RN1       | Classical   | Δ/Δ                        | Δ/Δ           | Δ/Δ         |                                                        | wt/wt                       |                 |                 |                   |               |            |                   |                 |
| GBM39     | Classical   | Δ/Δ                        | Δ/Δ           |             |                                                        | EGFRvIII<br>(amp)           |                 |                 |                   |               |            |                   |                 |
| Pr1.1     | ?           | Δ/Δ                        | Δ/Δ           |             |                                                        | wt/H773_V<br>774insPH       |                 |                 |                   |               |            |                   |                 |

**Supplementary Table 4 Primary and Secondary antibodies and their applications as used in this study**

| <b>PRIMARY ANTIBODIES</b> |              |                          |                          |                         |                                 |
|---------------------------|--------------|--------------------------|--------------------------|-------------------------|---------------------------------|
| <b>Antibody target</b>    | <b>Clone</b> | <b>Species/clonality</b> | <b>Supplier</b>          | <b>Catalogue number</b> | <b>Application and dilution</b> |
| Actin (pan)               | ACTN05 (C4)  | mouse mAb                | Thermo Scientific        | MA5-11869               | Western blot - 1:10 000         |
| AIF                       | D39D2        | rabbit mAb               | Cell Signaling           | 5318                    | Immunofluorescence - 1:300      |
| Akt (pan)                 | 40D4         | mouse mAb                | Cell Signaling           | 2920                    | Western blot - 1:1000           |
| Akt (pSer473)             | D9E          | rabbit mAb               | Cell Signaling           | 4060                    | Western blot - 1:1000           |
| CDK-1                     | POH1         | mouse mAb                | Cell Signaling           | 9116                    | Western blot - 1:1000           |
| CDK-1 (pThr161)           | -            | rabbit polyclonal        | Cell Signaling           | 9114                    | Western blot - 1:1000           |
| CDK-2                     | D-12         | mouse mAb                | Santa Cruz Biotechnology | sc-6248                 | Western blot - 1:500            |
| CDK-2 (pThr160)           | -            | rabbit polyclonal        | Cell Signaling           | 2561                    | Western blot - 1:1000           |
| CDK-6                     | 1F9.1        | mouse mAb                | Millipore                | MABC280                 | Western blot - 1:1000           |
| CDK-6 (pTyr24)            | -            | rabbit polyclonal        | Santa Cruz Biotechnology | sc-293097               | Western blot - 1:500            |
| CDK-7                     | C-19         | rabbit polyclonal        | Santa Cruz Biotechnology | sc-529                  | Western blot - 1:500            |
| CDK-7 (pThr170)           | -            | rabbit polyclonal        | Santa Cruz Biotechnology | sc-130185               | Western blot - 1:500            |
| Coilin                    | D2L3J        | rabbit mAb               | Cell Signaling           | 14168                   | Immunofluorescence - 1:300      |
| DDX21                     | -            | rabbit polyclonal        | NovusBIO                 | NBP1-83310              | Immunofluorescence - 1:200      |
| Dyskerin                  | H-3          | mouse mAb                | Santa Cruz Biotechnology | sc-373956               | Immunofluorescence - 1:100      |

|                                                       |                 |                   |                          |           |                                                         |
|-------------------------------------------------------|-----------------|-------------------|--------------------------|-----------|---------------------------------------------------------|
| EGFR                                                  | mAb806          | mouse mAb         | Abbot Pharmaceuticals    | N/A       | Western blot - 1:5000;<br>Flow cytometry -<br>1:1000    |
| EGFR (panitumumab)                                    | -               | human mAb         | Amgen                    | N/A       | Flow cytometry -<br>1:4000                              |
| ERK 1/2                                               | L34F12          | mouse mAb         | Cell Signaling           | 4696      | Western blot - 1:1000                                   |
| ERK 1/2 (pThr202/pTyr204)                             | D13.14.4E       | rabbit mAb        | Cell Signaling           | 4370      | Western blot - 1:1000                                   |
| FGFR3                                                 | C-15            | rabbit polyclonal | Santa Cruz Biotechnology | sc-123    | Western blot - 1:500                                    |
| FGFR3                                                 | MM0279-<br>6G11 | mouse mAb         | Abcam                    | ab89660   | Flow cytometry - 1:250<br>Immunofluorescence -<br>1:200 |
| Fibrillarin                                           | C13C3           | rabbit mAb        | Cell Signaling           | 2639      | Flow cytometry - 1:50;<br>Immunofluorescence -<br>1:400 |
| Histone H3 (pSer10) - AF647<br>conjugate              | D2C8            | rabbit mAb        | Cell Signaling           | 3458      | Immunohistochemistry -<br>1:500                         |
| Histone $\gamma$ -H2AX (pSer139)                      | 20E4            | rabbit mAb        | Cell Signaling           | 9718      | Flow cytometry - 1:50;<br>Immunofluorescence -<br>1:50  |
| Histone $\gamma$ -H2AX (pSer139) -<br>AF647 conjugate | 20E4            | rabbit mAb        | Cell Signaling           | 9720      | Flow cytometry -<br>1:1000                              |
| MET                                                   | LMH85           | mouse mAb         | Hudson Institute         | N/A       | Western blot - 1:500                                    |
| MRP-S6                                                | E-8             | mouse mAb         | Santa Cruz Biotechnology | sc-390597 |                                                         |
| p14                                                   | 4C6/4           | mouse mAb         | Cell Signaling           | 2407      | Western blot - 1:1000                                   |
| p21 (Waf1/Cip1)                                       | 12D1            | rabbit mAb        | Cell Signaling           | 2947      | Western blot - 1:1000                                   |

|                                          |       |            |                          |         |                                                          |
|------------------------------------------|-------|------------|--------------------------|---------|----------------------------------------------------------|
| p53                                      | DO-1  | mouse mAb  | Santa Cruz Biotechnology | sc-126  | Western blot - 1:1000                                    |
| PDGFR- $\alpha$                          | 16A1  | mouse mAb  | Abcam                    | ab96569 | Flow cytometry - 1:250                                   |
| PDGFR- $\alpha$                          | D1E1E | rabbit mAb | Cell Signaling           | 3174    | Western blot - 1:1000                                    |
| PDGFR- $\beta$                           | 2B3   | mouse mAb  | Cell Signaling           | 3175    | Western blot - 1:1000                                    |
| pSer/Thr (ATM/ATR motif)<br>MultimAb mix | -     | rabbit mAb | Cell Signaling           | 6966    | Western blot - 1:1000;<br>Immunoprecipitation -<br>1:100 |
| PTEN                                     | D4.3  | rabbit mAb | Cell Signaling           | 9188    | Western blot - 1:1000                                    |
| Rb                                       | 4H1   | mouse mAb  | Cell Signaling           | 9309    | Western blot - 1:1000                                    |
| RNA Polymerase II CTD (pSer2)            | 3E10  | rat mAb    | Millipore                | 04-1571 | Western blot - 1:500<br>Immunofluorescence -<br>1:500    |
| sc-35                                    | -     | mouse mAb  | Abcam                    | ab11826 | Immunofluorescence -<br>1:500                            |
| STAT3                                    | 79D7  | rabbit mAb | Cell Signaling           | 4904    | Western blot - 1:1000                                    |
| STAT3 (pTyr705)                          | 3E2   | mouse mAb  | Cell Signaling           | 9138    | Western blot - 1:1000                                    |
| TFAM                                     | D5C8  | rabbit mAb | Cell Signaling           | 8076    | Western blot - 1:1000                                    |
| UPF1                                     | D15G6 | rabbit mAb | Cell Signaling           | 12040   | Western blot - 1:1000;<br>Immunoprecipitation -<br>1:50  |

**SECONDARY ANTIBODIES**

| <b>Antibody target</b> | <b>Fluorophore Conjugate</b> | <b>Host</b> | <b>Supplier</b>   | <b>Catalogue number</b> | <b>Application and dilution</b>                       |
|------------------------|------------------------------|-------------|-------------------|-------------------------|-------------------------------------------------------|
| human IgG              | Alexa Fluor 647              | goat        | Life Technologies | A21445                  | Flow cytometry - 1:300                                |
| mouse IgG              | Alexa Fluor 647              | goat        | Life Technologies | A21235                  | Flow cytometry - 1:300;<br>Immunofluorescence - 1:100 |
| mouse IgG              | Alexa Fluor 647              | goat        | Life Technologies | A21058                  | Western blot - 1:10 000                               |
| rabbit IgG             | Alexa Fluor 488              | goat        | Life Technologies | A11034                  | Flow cytometry - 1:300;<br>Immunofluorescence - 1:100 |
| rabbit IgG             | IRDye 800                    | goat        | Licor Biosciences | 926-32211               | Western blot - 1:2000                                 |
| rat IgG                | IRDye 800                    | goat        | Licor Biosciences | 926-32219               | Western blot - 1:2000                                 |
